# Supplementary material
Source: PubMed Central journal article supplement (PMC6570451)
Supplement: JGMED18010861.pdf [file JGMED18010861.pdf]

**Supplemental Material**  
**Survey Instruments**

---

**IPASS Adherence Survey – December 2016**

Q1 What is your PGY level?

- 1
- 2
- 3+

Q2 Are you in a categorical or combined program?

- Categorical
- Combined

Q3 Did you receive I-PASS training?

- Yes
- No
- I don't remember

Q4 How effective did you find IPASS Training?

- Extremely effective
- Very effective
- Moderately effective
- Slightly effective
- Not effective at all

Hughes HK, Serwint JR, O'Toole JK, Spector ND, Ngo TL. I-PASS adherence and implications for future handoff training. *J Grad Med Educ.* 2019;11(3):301–3016.

Q5 How effective do you think IPASS is at enhancing patient safety?

- Extremely effective
- Very effective
- Moderately effective
- Slightly effective
- Not effective at all

*The following questions are related to routine handoffs that are NOT directly observed by faculty.*

Q6 How often do you use all 5 elements of IPASS when GIVING a verbal handoff to another resident (when not being formally observed)?

- < 25% of the time
- 25-49% of the time
- 50-75% of the time
- > 75% of the time

Q7 How often do you provide a patient synthesis statement when RECEIVING a verbal handoff?

- < 25% of the time
- 25-49% of the time
- 50-75% of the time
- > 75% of the time

Q8 How often do your colleagues use all 5 elements of IPASS during a verbal handoff?

- < 25% of the time
- 25-49% of the time
- 50-75% of the time
- > 75% of the time

Hughes HK, Serwint JR, O'Toole JK, Spector ND, Ngo TL. I-PASS adherence and implications for future handoff training. *J Grad Med Educ.* 2019;11(3):301–3016.

Q9 How often do your colleagues provide a patient synthesis statement when RECEIVING a verbal handoff?

- < 25% of the time
- 25-49% of the time
- 50-75% of the time
- > 75% of the time

Q10 When not being observed, list 3 reasons that you may choose NOT to use the IPASS mnemonic during a verbal handoff.

Q11 When not being observed, list 3 reasons that you DO choose to use the IPASS mnemonic during a verbal handoff.

### **IPASS Adherence Survey – June 2017**

Q1 What is your PGY level?

- 1
- 2
- 3+

Q2 Are you in a categorical or combined program?

- Categorical
- Combined

Q3 How effective do you think IPASS is at enhancing patient safety?

- Extremely effective
- Very effective
- Moderately effective
- Slightly effective
- Not effective at all

Hughes HK, Serwint JR, O'Toole JK, Spector ND, Ngo TL. I-PASS adherence and implications for future handoff training. *J Grad Med Educ.* 2019;11(3):301–3016.

*The following questions are related to routine handoffs that are NOT directly observed by faculty.*

Q4 In the last 3 months, on average how often did you use all 5 elements of IPASS when GIVING a verbal handoff to another resident (when not being formally observed)?

- < 25% of the time
- 25-49% of the time
- 50-75% of the time
- > 75% of the time

Q5 In the last 3 months, on average how often did you provide a patient synthesis statement when RECEIVING a verbal handoff?

- < 25% of the time
- 25-49% of the time
- 50-75% of the time
- > 75% of the time

Q6 In the last 3 months, on average how often did your colleagues use all 5 elements of IPASS during a verbal handoff?

- < 25% of the time
- 25-49% of the time
- 50-75% of the time
- > 75% of the time

Q7 In the last 3 months, on average how often did your colleagues provide a patient synthesis statement when RECEIVING a verbal handoff?

- < 25% of the time
- 25-49% of the time
- 50-75% of the time
- > 75% of the time

Q8 If you choose not to use all 5 elements of I-PASS, which element(s) do you not use and why?

Q9 On which rotations do you use I-PASS **most** frequently?

Hughes HK, Serwint JR, O'Toole JK, Spector ND, Ngo TL. I-PASS adherence and implications for future handoff training. *J Grad Med Educ.* 2019;11(3):301–3016.

Q10 On which rotations do you use I-PASS **least** frequently?

Q11 Do you have any other comments regarding IPASS or this year's IPASS implementation?
